# Supplementary material for: Improvements to the production of ZIF-94; a case study in MOF scale-up
Source: Royal Society of Chemistry journal article supplement (doi:10.1039/c9gc00783k), 2019-01-01
Supplement: c9gc00783k1.pdf [file c9gc00783k1.pdf]

# Supporting information

## **Improvements to the production of ZIF-94; a case study in MOF scale-up.**

Timothy Johnson<sup>a</sup>, Magdalena M. Łozińska<sup>b</sup>, Angelica Orsi<sup>b</sup>, Paul A. Wright<sup>b</sup>, Sheena Hindocha<sup>a</sup>, Stephen Poulston<sup>a</sup>.

<sup>a</sup> Johnson Matthey Technology Centre, Blount's Court, Sonning Common, RG4 9NH UK.

<sup>b</sup> EaStCHEM School of Chemistry, University of St Andrews, Purdie Building, North Haugh, St Andrews, Fife, KY16 9ST, United Kingdom.

## Determination of solid content.

The solid content of the reaction was determined using the density of methanol (0.78 g mL<sup>-1</sup>) and THF (0.889 g mL<sup>-1</sup>). The final figure rounded to the closest whole number.

The below equation was used:

$$\text{Solid Content (wt\%)} = \frac{\text{Total solids (g)}}{((\text{THF Vol. (mL)} \times 0.889) + (\text{MeOH Vol. (mL)} \times 0.79))} \times 100$$

A worked example for entry 9 is shown below

$$\frac{5.28}{((50 \times 0.889) + (20 \times 0.79))} \times 100 = 8.76 \% \therefore 9 \text{ wt\%}$$

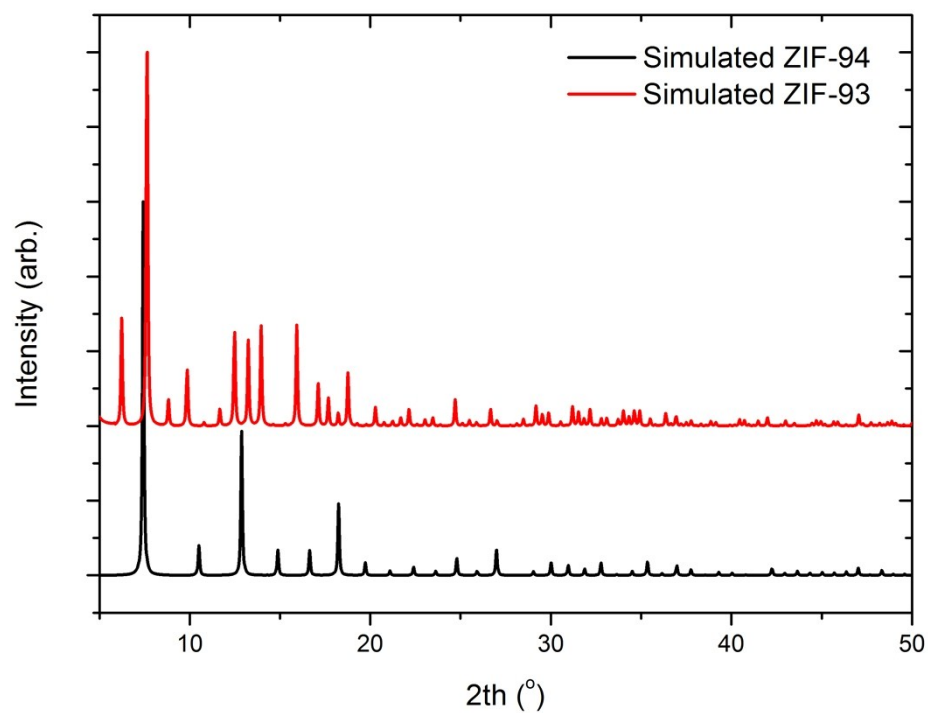

S 1: Simulated XRD patterns for ZIF-94 and ZIF-93

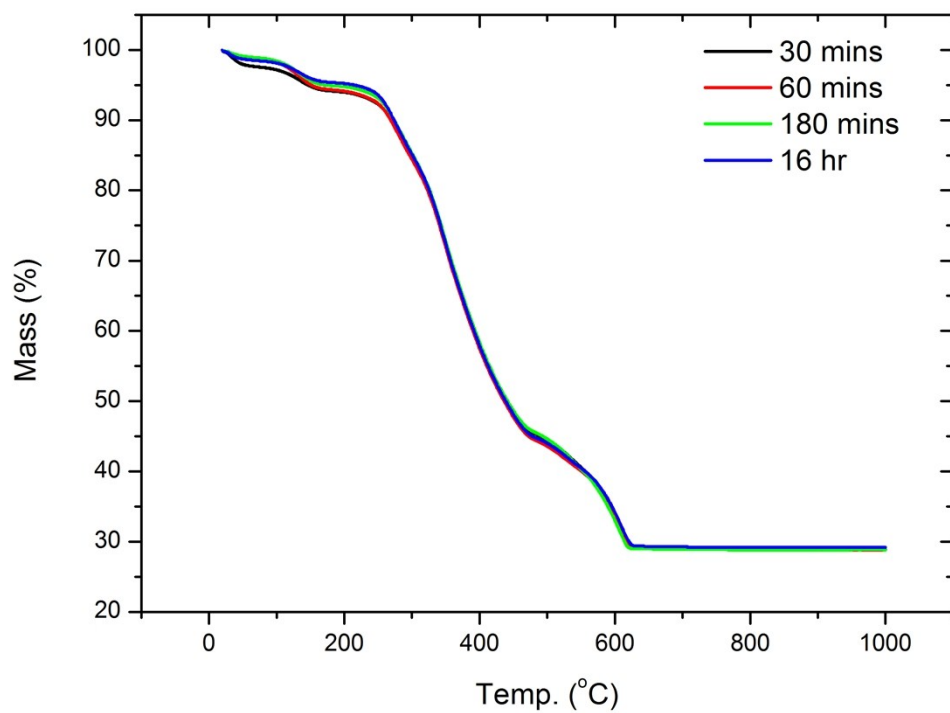

S 2 TGA traces for ZIF-94 samples produced at various reaction times

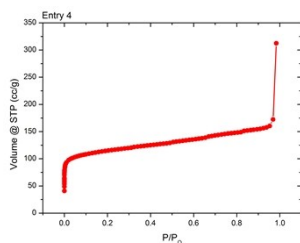

a)

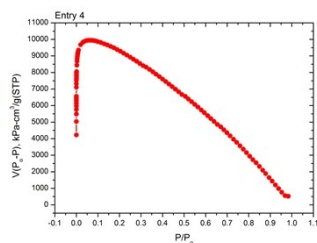

b)

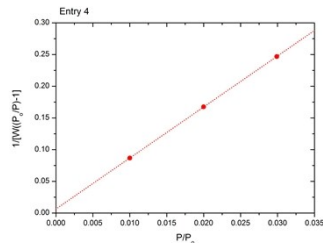

c)

S 3:  $N_2$  isotherm, b) Rouquerol plot and c) three-point BET plot for entry 4.

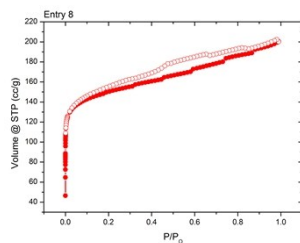

a)

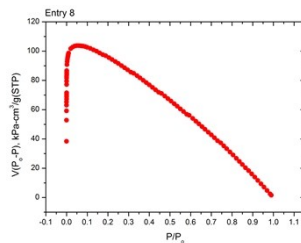

b)

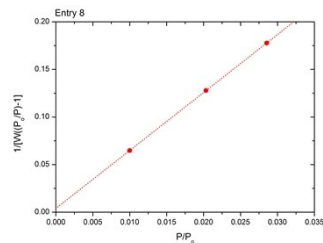

c)

S 4  $N_2$  isotherm, b) Rouquerol plot and c) three-point BET plot for entry 8.

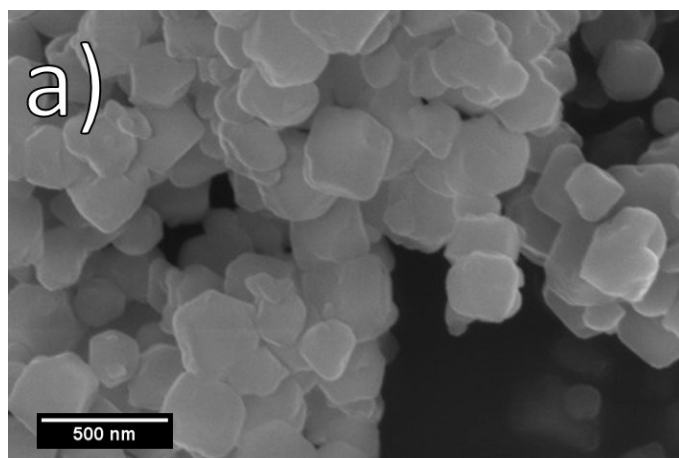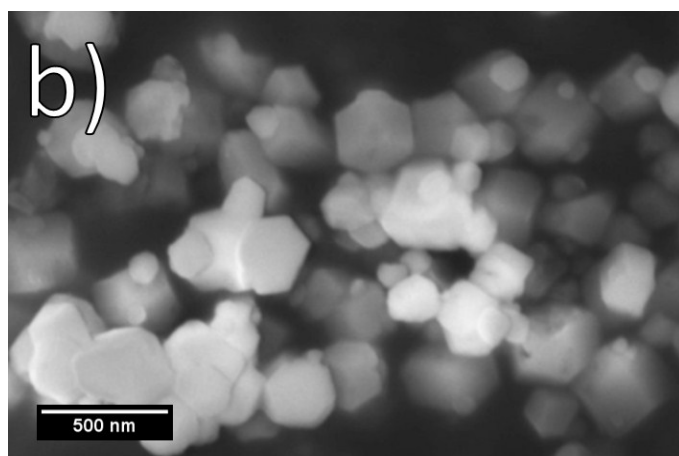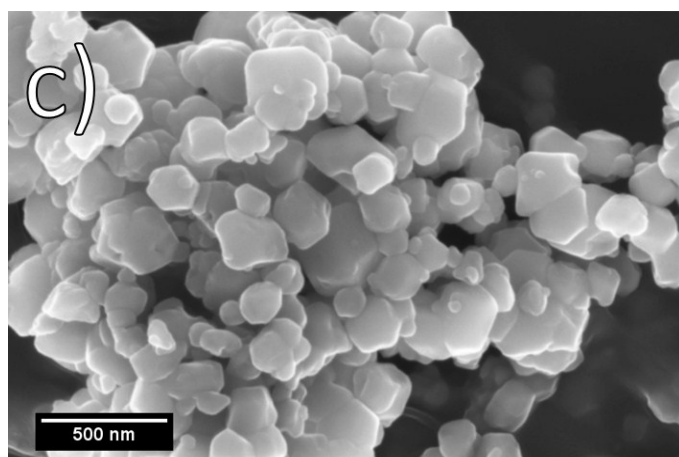

*S 5: SEM micrographs for entries a) 4, b) 5 and c) 6.*

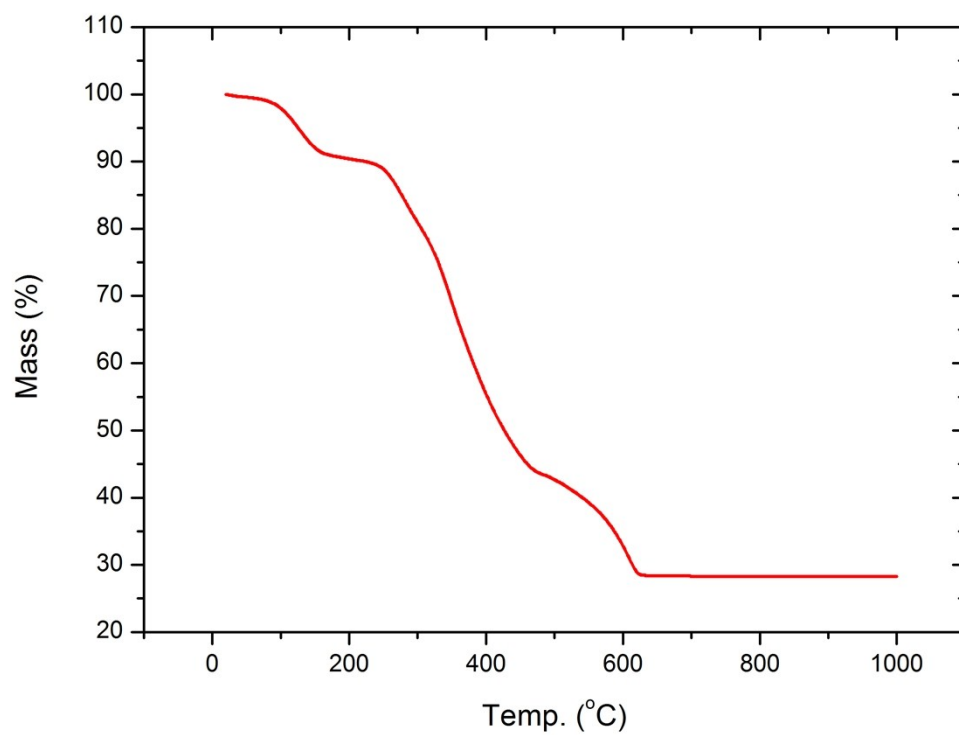

S 6: TGA of ZIF-94 produced at large scale (entry 11)

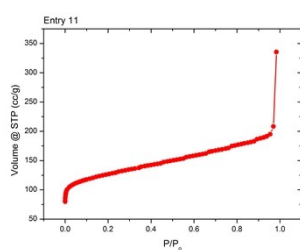

a)

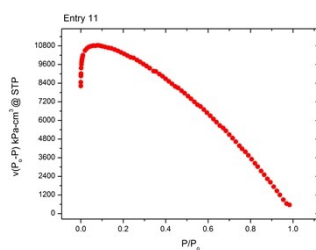

b)

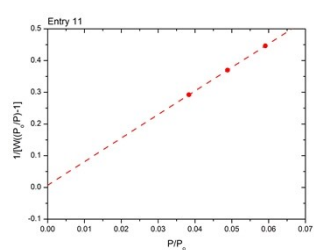

c)

S 7 a)  $N_2$  isotherm, b) Rouquerol plot and c) three-point BET plot for entry 11.

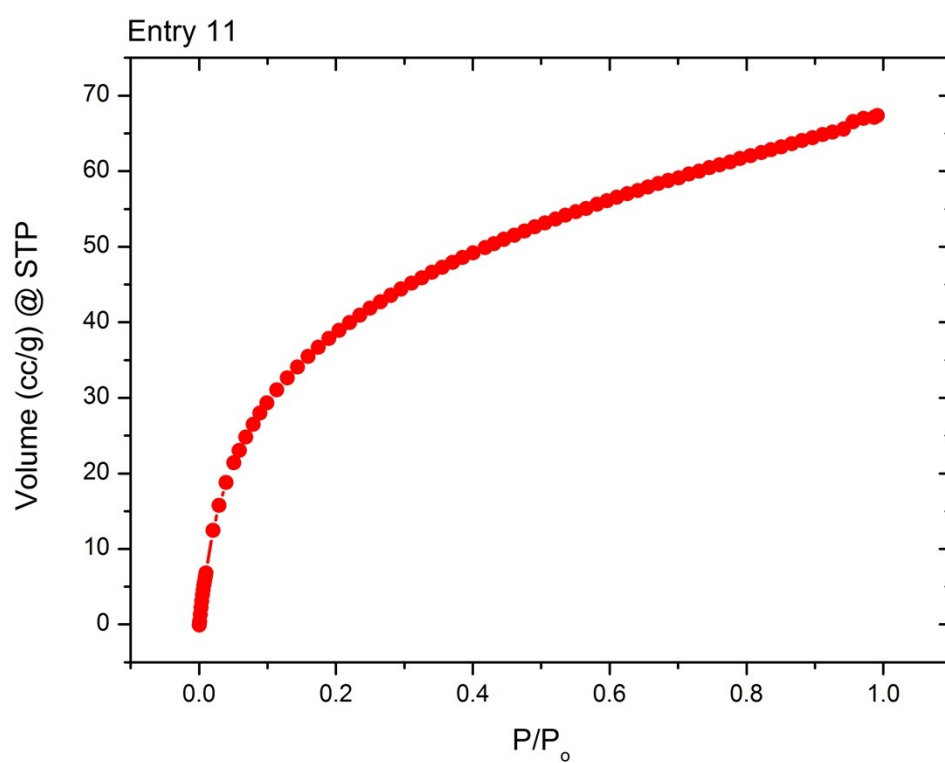

*S 8 CO<sub>2</sub> uptake isotherm for Entry 11*

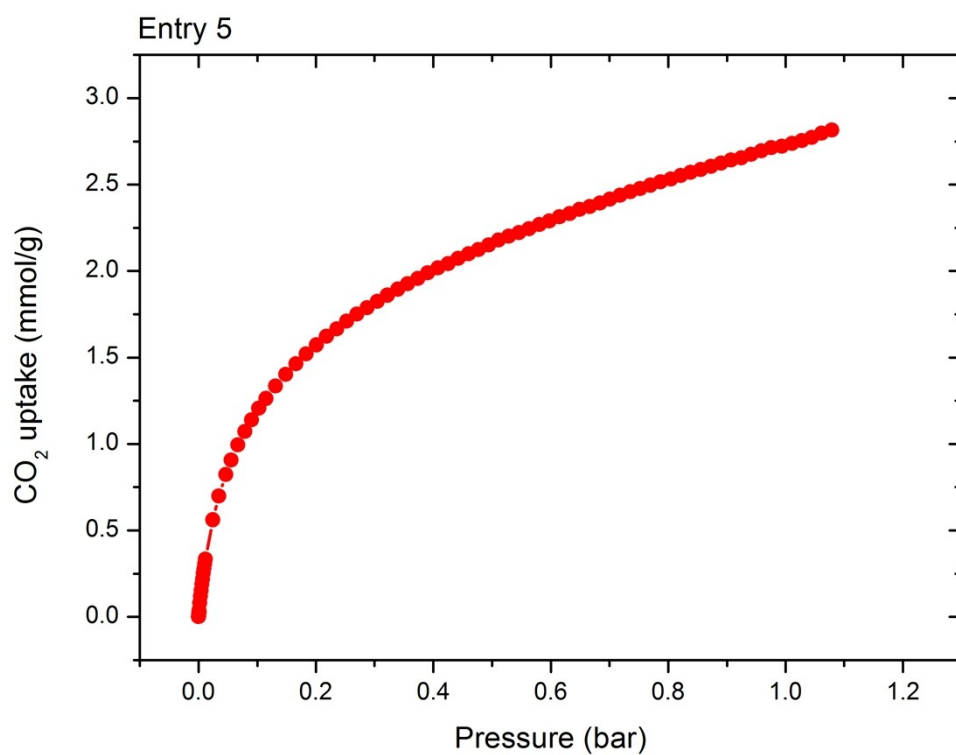

*S9 CO<sub>2</sub> uptake isotherm for Entry 5*
